# Supplementary material for: Treatment of diabetes mellitus-induced erectile dysfunction using endothelial progenitor cells genetically modified with human telomerase reverse transcriptase
Source: PubMed Central journal article supplement (PMC5129934; doi:10.18632/oncotarget.9909), 2016-06-07
Supplement: oncotarget-07-39302-s001.pdf [file oncotarget-07-39302-s001.pdf]

# Treatment of diabetes mellitus-induced erectile dysfunction using endothelial progenitor cells genetically modified with human telomerase reverse transcriptase

## Supplementary Material

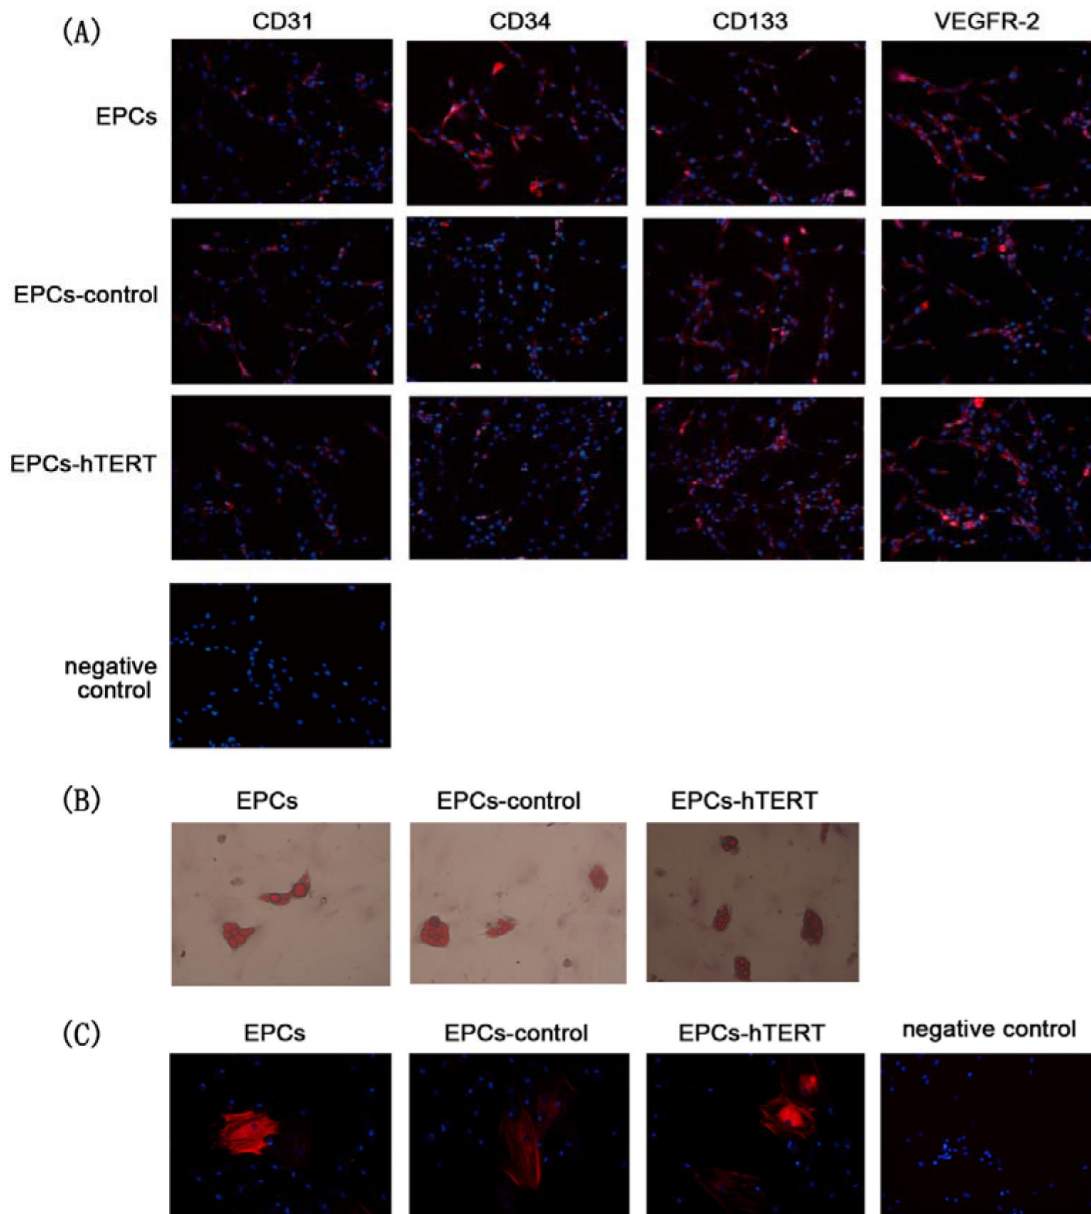

Supplemental figure 1. Phenotypic profile and differentiation potential of EPCs-hTERT. (A) CD31, CD34, CD133 and VEGFR-2 expression was detected using immunofluorescence (200 $\times$ ). (B) Adipogenesis of EPCs-hTERT was demonstrated using oil red-O staining (200 $\times$ ). (C) EPC-hTERT differentiation potential into smooth muscle cells was demonstrated using immunofluorescence staining (200 $\times$ ).
